# Supplementary material for: Electromyographic evaluation of high-intensity elastic resistance exercises for lower extremity muscles during bed rest
Source: Springer Nature journal article supplement (doi:10.1007/s00421-017-3620-2), 2017-04-26
Supplement: MOESM1 [file 12249602]

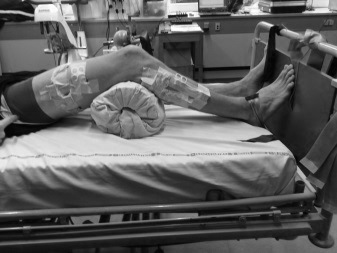

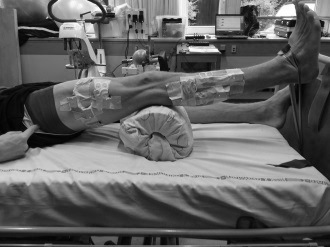


A B


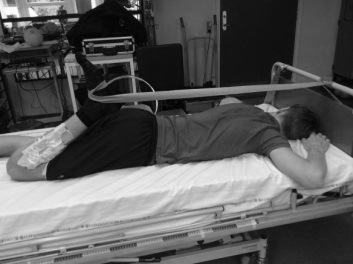

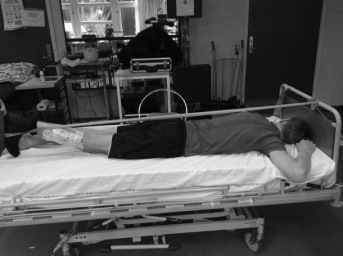


**Figure 2** – Femoris muscle setting (top) prone knee extension (bottom). “A” and “B” denote starting- and ending position, respectively.

A B


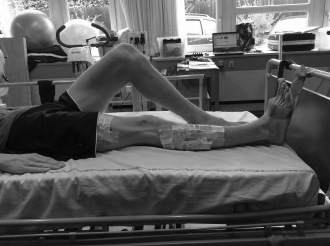

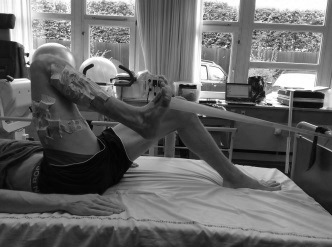

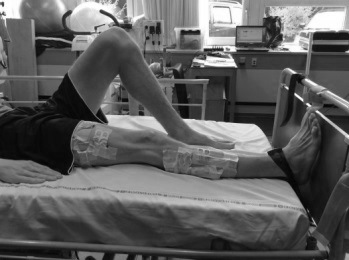

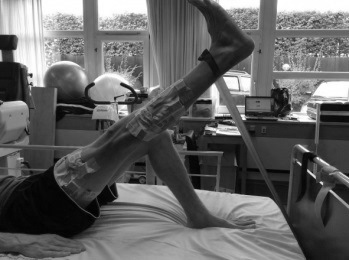


**Figure 3** – Hip flexion with bent leg (top) and hip flexion with straight leg (bottom). “A” and “B” denote starting- and ending position, respectively.

A B


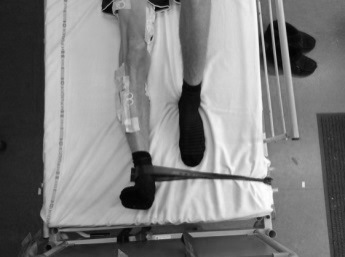

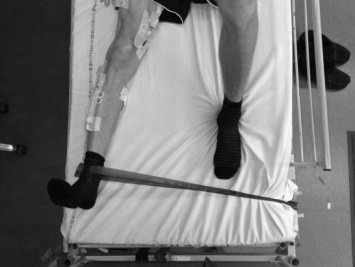

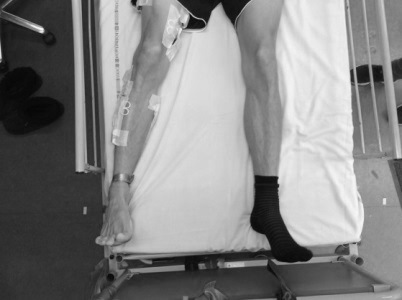

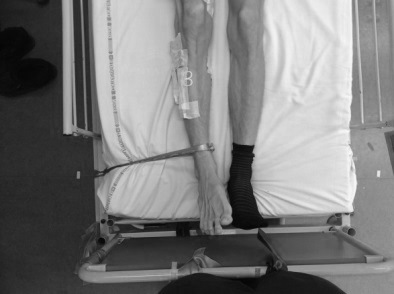


**Figure 4** – Hip abduction (top) and hip adduction (bottom). “A” and “B” denote starting- and ending position, respectively.

A B


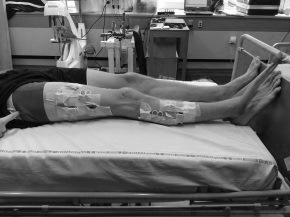

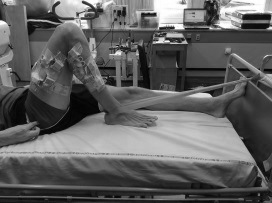

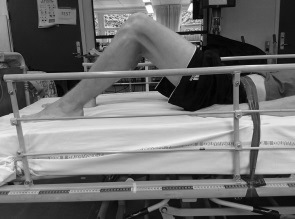

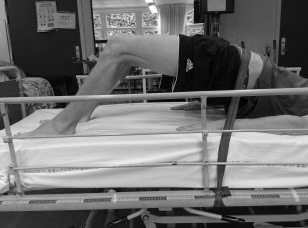


**Figure 5** – Supine knee flexion (top) and hip thrust (bottom). “A” and “B” denote starting- and ending position, respectively.


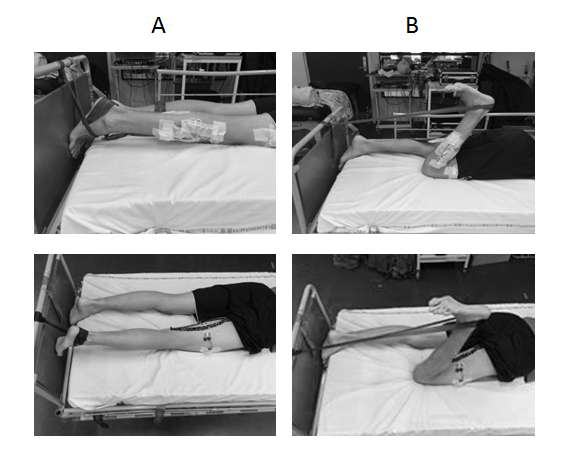


**Figure 6** – Prone knee flexion without (top) and prone knee flexion with Kinesiology Tape (bottom). “A” and “B” denote starting- and ending position, respectively.


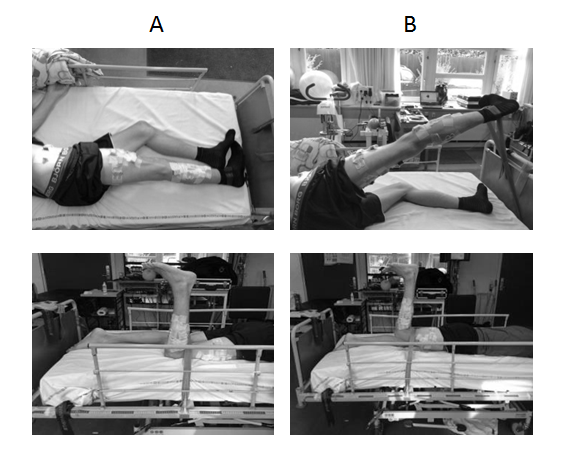


**Figure 7** – Sideways hip abduction (top) and Hip extension with bent leg (bottom). “A” and “B” denote starting- and ending position, respectively.


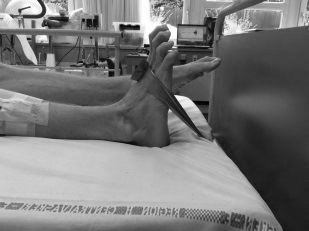

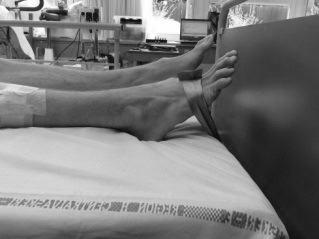

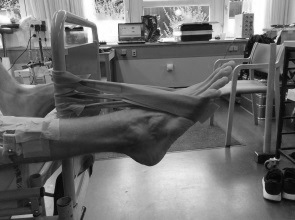

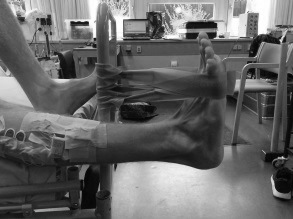


A B

**Figure 8** – Plantar flexion (top) and dorsal flexion (bottom). “A” and “B” denote starting- and ending position, respectively.
